# Supplementary material for: Review on magnetic nanoferrites and their composites as alternatives in waste water treatment: synthesis, modifications and applications
Source: Royal Society of Chemistry journal article supplement (doi:10.1039/c9ew00858f), 2019-12-17
Supplement: c9ew00858f1.pdf [file c9ew00858f1.pdf]

## **Review on magnetic nano ferrites and their composites as an alternative in Waste Water Treatment: Synthesis, modifications and applications**

**Authors:** Mukesh Kumar<sup>1</sup>, Harmanjit Singh Dosanjh<sup>2</sup>, Sonika<sup>2</sup>, Jandeep Singh<sup>2</sup>, Kamarul Monir<sup>1</sup>,  
Harminder Singh<sup>2,\*</sup>

<sup>1</sup> Oil and Natural Gas Corporation,

Mumbai, Maharashtra-400051, India

<sup>2</sup> Department of Chemistry

School of Chemical Engineering and Physical Science,

Lovely Professional University, Phagwara

Punjab-144411, India

\* Corresponding Author

Email: [harminder\\_env@yahoo.com](mailto:harminder_env@yahoo.com)

## Supplementary Material

Hessien *et al.* [36] synthesized  $\text{SrFe}_{12}\text{O}_{19}$  by chemical co-precipitation method at calcination temperature of 900, 1000 and 1100 °C. Table 1 represents the effect of annealing temperature that influence size and different magnetic properties of prepared nano ferrites.

**Table 1:** Effect of annealing temperature on the formation, crystalline size and magnetic properties of  $\text{SrFe}_{12}\text{O}_{19}$  powder precipitated at pH 10 for  $\text{Fe}^{3+}/\text{Sr}^{2+}$  mole ratio: (a) 10 and (b) 9.23 annealed for 2 h. (Reproduced with permission from Ref. [36] Copyright © 2007 Elsevier B.V.)

| $\text{Fe}^{3+}/\text{Sr}^{2+}$ | Annealing temp. (°C) | % Phase change obtained                                            | Crystalline size | Magnetic $H_c$ (Oe) | Properties $M_s$ (emu /g) | $M_r$ (emu/g) |
|---------------------------------|----------------------|--------------------------------------------------------------------|------------------|---------------------|---------------------------|---------------|
| <b>10.0</b>                     | <b>800</b>           | 65% $\text{SrFe}_{12}\text{O}_{19}$<br>35% $\text{Fe}_2\text{O}_3$ | 82.9<br>71.0     | 4524                | 50.64                     | 27.06         |
|                                 | <b>900</b>           | 70% $\text{SrFe}_{12}\text{O}_{19}$<br>30% $\text{Fe}_2\text{O}_3$ | 106.3<br>109.5   | 5060                | 55.18                     | 29.85         |
|                                 | <b>1000</b>          | 70% $\text{SrFe}_{12}\text{O}_{19}$<br>30% $\text{Fe}_2\text{O}_3$ | 128.3<br>189.4   | 5168                | 55.85                     | 29.85         |
|                                 | <b>1100</b>          | 63% $\text{SrFe}_{12}\text{O}_{19}$<br>34% $\text{Fe}_2\text{O}_3$ | 186.6<br>208.7   | 4779                | 56.9                      | 31.31         |
| <b>9.2</b>                      | <b>800</b>           | 92% $\text{SrFe}_{12}\text{O}_{19}$<br>8% $\text{Fe}_2\text{O}_3$  | 114.5            | 4727                | 61.47                     | 31.89         |
|                                 | <b>900</b>           | 100% $\text{SrFe}_{12}\text{O}_{19}$                               | 98.0             | 5158                | 64.72                     | 34.80         |
|                                 | <b>1000</b>          | 100% $\text{SrFe}_{12}\text{O}_{19}$                               | 118.8            | 4434                | 84.15                     | 45.04         |
|                                 | <b>1100</b>          | 100% $\text{SrFe}_{12}\text{O}_{19}$                               | 158.8            | 2937                | 65.49                     | 35.19         |

## 2.0 Metal and Their Oxide Deposition

Effect of metal and their oxide deposition affect crystallite size, morphology and magnetic properties of different nano ferrites. For example, Rashad *et al.* [60] prepared Sm substituted  $\text{CoFe}_2\text{O}_4$  by citrate precursor method and studied the effect of Sm content on crystal

structure, crystallite size, morphology and magnetic properties of  $\text{CoSm}_x\text{Fe}_{2-x}\text{O}_4$ . Table 2 represents the effect of Sm ions content on crystal size and magnetic properties of prepared composites and the analysis revealed that the crystalline size of produced nano composite decreased by increase in Sm content and increased with increasing the calcination temperature from 400 to 1000 °C.

**Table 2:** Average crystalline size of produced  $\text{CoFe}_{2-x}\text{Sm}_x\text{O}_4$  at different temperature from 400 to 1000° C where  $x = 0.0\text{--}0.4$ . (Reproduced with permission from Ref. [60] Copyright © 2007 Elsevier B.V.)

| Temperature (°C) | Sm Content x (0.0–0.4) | Crystalline size (nm) |
|------------------|------------------------|-----------------------|
| 400              | 0.0                    | 21.5                  |
|                  | 0.1                    | 14.9                  |
|                  | 0.2                    | 10.8                  |
|                  | 0.3                    | 9.4                   |
|                  | 0.4                    | 7.6                   |
| 600              | 0.0                    | 30.6                  |
|                  | 0.1                    | 18.8                  |
|                  | 0.2                    | 12.4                  |
|                  | 0.3                    | 10.8                  |
|                  | 0.4                    | 9.7                   |
| 800              | 0.0                    | 52.1                  |
|                  | 0.1                    | 33.7                  |
|                  | 0.2                    | 27.6                  |
|                  | 0.3                    | 25.5                  |
|                  | 0.4                    | 21.2                  |
| 1000             | 0.0                    | 85.9                  |
|                  | 0.1                    | 75.8                  |
|                  | 0.2                    | 61.9                  |
|                  | 0.3                    | 53.7                  |
|                  | 0.4                    | 50.9                  |
